# Supplementary material for: The liquid phase epitaxy method for the construction of oriented ZIF-8 thin films with controlled growth on functionalized surfaces
Source: Royal Society of Chemistry journal article supplement (doi:10.1039/c3cc45343j), 2013-01-01

## **The liquid phase epitaxy method for the construction of oriented ZIF-8 thin films with controlled growth on functionalized surfaces.**

**Osama Shekhah,<sup>a</sup> and Mohamed Eddaoudi <sup>\*a</sup>**

*<sup>a</sup> Functional Materials Design, Discovery & Development Research Group (FMD3), Advanced Membranes & Porous Materials Center, Division of Physical Sciences and Engineering, King Abdullah University of Science and Technology, Thuwal 23955-6900, Kingdom of Saudi Arabia  
E-mail: mohamed.eddaoudi@kaust.edu.sa*

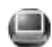

**Scheme S1.** Representation of the ZIF-8 crystal structure along the six-membered ring with its window size depicted.

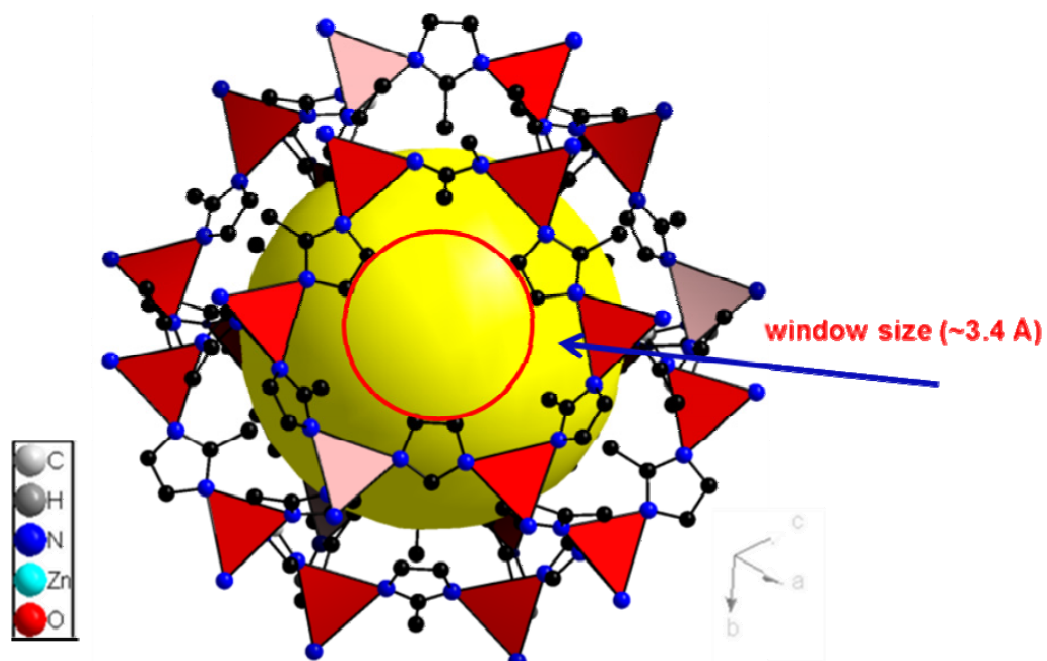

## Experimental Section

Thin film preparation: Gold substrates (200-nm Au/2-nm Ti evaporated on Si wafers) were first functionalized with self-assembled monolayers (SAMs) of 11-mercaptoundecanol (MUD). The freshly prepared substrates were then immersed subsequently in a 100 mM of  $\text{Zn}(\text{NO}_3)_2 \cdot 6\text{H}_2\text{O}$  methanol solution for 2 minutes and in a 50 mM 2-Methylimidazole (mIm) methanol solution for 3 minutes at room temperature. Between each step the substrates were rinsed with methanol and dried in a nitrogen stream. Gold substrates were also functionalized with SAMs of 16-mercaptohexadecanoic acid (MHDA). The freshly prepared substrates were then immersed subsequently in a 100 mM of  $\text{Zn}(\text{NO}_3)_2 \cdot 6\text{H}_2\text{O}$  methanol solution for 2 minutes and in a 50 mM 2-Methylimidazole (mIm) methanol solution for 3 minutes at room temperature. Between each step the substrates were rinsed with methanol and dried in a nitrogen stream (Fig. S1).

**Fig. S1** Schematic representation showing the concept of the LPE method for the growth of ZIF-8 thin films on a SAM-functionalized Au substrate. The substrate is immersed in a metal ion solution (1), washed with solvent (2), immersed in an organic ligand solution (3), and washed with solvent (4). The process is repeated to grow more cycles (5).

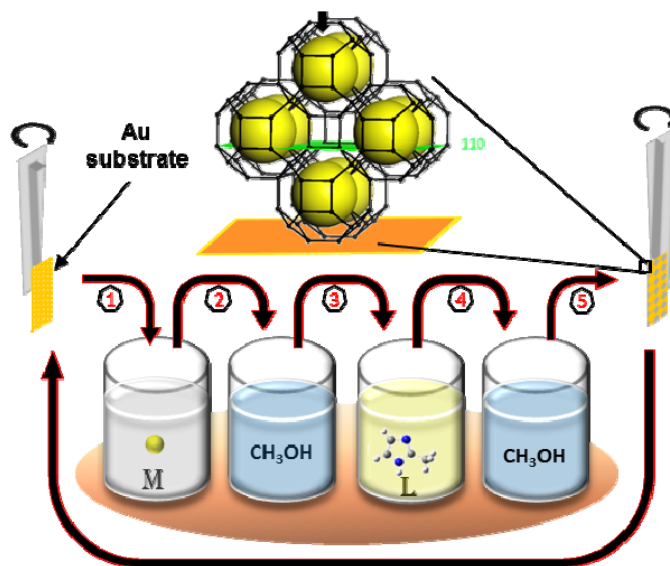

**Fig. S2** The thickness of the ZIF-8 thin film grown with the LPE method versus the number of growth cycles.

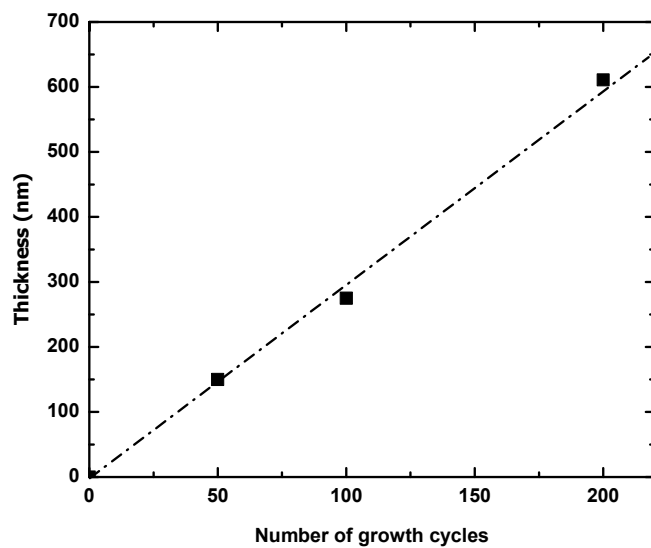

Supplement: c3cc45343j.pdf [file c3cc45343j.pdf]
